# Supplementary material
Source: MDPI journal article supplement (https://www.mdpi.com/2227-7099/9/4/161)
Supplement: s1 [file s1]

# Supplementary Materials: Regime-Switching Determinants of Mutual Fund Performance in South Africa

Richard Apau, Peter Moores-Pitt and Paul-Francois Muzindutsi

**Table S1.** Normality and unit root test on the MS variables.

| Fund          | Variable | Mean   | Std. Dev. | Skewness | Kurtosis | Jarque-Bera | Probability | Observations | ADF unit root test |
|---------------|----------|--------|-----------|----------|----------|-------------|-------------|--------------|--------------------|
| DENKER        | Flows    | 0.804  | 0.429     | -1.620   | 8.769    | 102.171     | 0.000       | 56           | -7.413***          |
|               | Perf     | 0.363  | 1.565     | 0.196    | 3.626    | 4.079       | 0.013       | 56           | -6.589***          |
|               | Ecosize  | 0.825  | 1.046     | -1.029   | 2.963    | 9.885       | 0.007       | 56           | -0.614***          |
|               | Size     | 6.024  | 3.037     | -1.450   | 3.225    | 19.751      | 0.000       | 56           | -3.751***          |
|               | Stdret   | 0.006  | 0.001     | 0.858    | 4.333    | 11.022      | 0.004       | 56           | -5.393***          |
|               | Stdmkt   | 0.712  | 0.205     | 1.265    | 5.156    | 25.784      | 0.000       | 56           | -3.647***          |
|               | Lnage    | 0.476  | 0.376     | 0.382    | 1.567    | 6.160       | 0.046       | 56           | -7.736***          |
| GRAVITON      | Flows    | 0.072  | 0.775     | -0.210   | 1.256    | 7.509       | 0.023       | 56           | -3.382***          |
|               | Perf     | 1.699  | 1.454     | -1.656   | 5.738    | 56.641      | 0.000       | 56           | -6.159***          |
|               | Ecosize  | 0.825  | 1.046     | -1.029   | 2.963    | 9.885       | 0.007       | 56           | -0.614***          |
|               | Size     | 0.136  | 0.577     | 0.811    | 4.975    | 15.240      | 0.000       | 56           | -7.857***          |
|               | Stdret   | 0.002  | 0.001     | 1.256    | 5.559    | 29.994      | 0.000       | 56           | -4.601***          |
|               | Stdmkt   | 0.712  | 0.205     | 1.265    | 5.156    | 25.784      | 0.000       | 56           | -3.647***          |
|               | Lnage    | 0.791  | 0.055     | -0.706   | 2.424    | 5.436       | 0.066       | 56           | -3.879***          |
| GTC           | Flows    | 0.730  | 21.552    | -0.816   | 13.051   | 241.942     | 0.000       | 56           | -4.979***          |
|               | Perf     | 0.114  | 2.618     | 0.034    | 4.161    | 9.337       | 0.009       | 56           | -6.353***          |
|               | Ecosize  | 0.825  | 1.046     | -1.029   | 2.963    | 9.885       | 0.007       | 56           | -0.614***          |
|               | Size     | 0.136  | 0.577     | 0.811    | 4.975    | 15.240      | 0.000       | 56           | -3.727***          |
|               | Stdret   | 0.006  | 0.005     | -0.145   | 1.965    | 2.690       | 0.072       | 56           | -2.930***          |
|               | Stdmkt   | 0.712  | 0.205     | 1.265    | 5.156    | 25.784      | 0.000       | 56           | -3.647***          |
|               | Lnage    | 3.049  | 0.194     | -0.229   | 1.858    | 3.531       | 0.080       | 56           | -13.708***         |
| HUYSAMER      | Flows    | -0.039 | 2.842     | 1.199    | 4.717    | 20.319      | 0.000       | 56           | -7.481***          |
|               | Perf     | 0.459  | 3.779     | -0.183   | 3.450    | 7.330       | 0.025       | 56           | -7.219***          |
|               | Ecosize  | 0.825  | 1.046     | -1.029   | 2.963    | 9.885       | 0.007       | 56           | -0.614***          |
|               | Size     | 1.338  | 0.171     | 1.731    | 8.779    | 105.938     | 0.000       | 56           | -4.342***          |
|               | Stdret   | 0.009  | 0.003     | 3.733    | 21.896   | 963.217     | 0.000       | 56           | -4.715***          |
|               | Stdmkt   | 0.712  | 0.205     | 1.265    | 5.156    | 25.784      | 0.000       | 56           | -3.647***          |
|               | Lnage    | 1.325  | 0.069     | -0.391   | 1.986    | 3.826       | 0.012       | 56           | -29.173***         |
| DALEBROOK     | Flows    | -0.052 | 3.192     | 0.219    | 1.470    | 5.907       | 0.052       | 56           | -3.076***          |
|               | Perf     | 0.275  | 3.068     | -0.415   | 3.332    | 6.107       | 0.047       | 56           | -6.463***          |
|               | Ecosize  | 0.825  | 1.046     | -1.029   | 2.963    | 9.885       | 0.007       | 56           | -0.614***          |
|               | Size     | 1.678  | 0.143     | -0.466   | 4.271    | 5.797       | 0.055       | 56           | -8.739***          |
|               | Stdret   | 0.009  | 0.002     | 1.071    | 4.741    | 17.768      | 0.000       | 56           | -3.491***          |
|               | Stdmkt   | 0.712  | 0.205     | 1.265    | 5.156    | 6.107       | 0.047       | 56           | -3.647***          |
|               | Lnage    | 0.592  | 0.607     | 0.846    | 2.196    | 8.186       | 0.017       | 56           | -22.230***         |
| COUNTER-POINT | Flows    | 4.366  | 13.153    | 4.046    | 19.452   | 784.326     | 0.000       | 56           | -3.664***          |
|               | Perf     | 0.553  | 1.535     | -0.081   | 3.853    | 21.128      | 0.000       | 56           | -7.282***          |
|               | Ecosize  | 0.825  | 1.046     | -1.029   | 2.963    | 9.885       | 0.007       | 56           | -0.614***          |
|               | Size     | 1.792  | 2.288     | 0.533    | 1.374    | 8.817       | 0.012       | 56           | -3.676***          |
|               | Stdret   | 0.005  | 0.016     | 6.821    | 49.657   | 5513.497    | 0.000       | 56           | -7.117***          |
|               | Stdmkt   | 0.712  | 0.205     | 1.265    | 5.156    | 25.784      | 0.000       | 56           | -3.647***          |
|               | Lnage    | 0.608  | 0.763     | 0.632    | 1.677    | 7.814       | 0.020       | 56           | -13.562***         |
| CANNON        | Flows    | -0.086 | 1.364     | 0.296    | 1.414    | 6.691       | 0.035       | 56           | -5.137***          |
|               | Perf     | 1.162  | 5.517     | 0.554    | 3.631    | 29.876      | 0.000       | 56           | -4.558***          |
|               | Ecosize  | 0.825  | 1.046     | -1.029   | 2.963    | 9.885       | 0.007       | 56           | -0.614***          |

|            |         |        |        |        |        |          |       |    |            |
|------------|---------|--------|--------|--------|--------|----------|-------|----|------------|
|            | Size    | 0.543  | 0.477  | -0.256 | 1.110  | 8.947    | 0.011 | 56 | -3.812***  |
|            | Stdret  | 0.007  | 0.005  | 0.452  | 7.727  | 54.042   | 0.000 | 56 | -4.489***  |
|            | Stdmkt  | 0.712  | 0.205  | 1.265  | 5.156  | 25.784   | 0.000 | 56 | -3.647***  |
|            | Lnage   | 0.128  | 0.326  | 2.274  | 6.538  | 77.448   | 0.000 | 56 | -22.521*** |
| BRIDGE     | Flows   | 2.496  | 13.608 | 6.319  | 45.040 | 4496.589 | 0.000 | 56 | -6.743***  |
|            | Perf    | 3.469  | 3.574  | -0.539 | 2.235  | 34.138   | 0.000 | 56 | -6.602***  |
|            | Ecosize | 0.825  | 1.046  | -1.029 | 2.963  | 9.885    | 0.007 | 56 | -0.614***  |
|            | Size    | 2.022  | 2.744  | 0.610  | 1.388  | 9.535    | 0.009 | 56 | -7.178***  |
|            | Stdret  | 0.004  | 0.005  | 0.483  | 1.749  | 5.830    | 0.054 | 56 | -6.798***  |
|            | Stdmkt  | 0.712  | 0.205  | 1.265  | 5.156  | 25.784   | 0.000 | 56 | -3.647***  |
|            | Lnage   | 1.127  | 0.169  | -0.864 | 2.781  | 7.078    | 0.029 | 56 | -6.570***  |
| ANALYTICS  | Flows   | -0.991 | 12.188 | 0.813  | 20.457 | 717.208  | 0.000 | 56 | -5.476***  |
|            | Perf    | 2.232  | 2.982  | -1.317 | 4.266  | 6.834    | 0.000 | 56 | -6.157***  |
|            | Ecosize | 0.825  | 1.046  | -1.029 | 2.963  | 9.885    | 0.007 | 56 | -0.614***  |
|            | Size    | 3.042  | 3.308  | 0.162  | 1.051  | 9.107    | 0.011 | 56 | -9.082***  |
|            | Stdret  | 0.003  | 0.004  | 0.537  | 1.686  | 6.721    | 0.035 | 56 | -4.601***  |
|            | Stdmkt  | 0.712  | 0.205  | 1.265  | 5.156  | 25.784   | 0.000 | 56 | -3.647***  |
|            | Lnage   | 0.582  | 0.031  | -0.750 | 2.499  | 5.837    | 0.054 | 56 | -29.173*** |
| 360One     | Flows   | 16.852 | 58.165 | 3.307  | 18.756 | 681.506  | 0.000 | 56 | -0.447***  |
|            | Perf    | 3.666  | 5.000  | -1.055 | 4.249  | 14.025   | 0.001 | 56 | -0.669***  |
|            | Ecosize | 0.825  | 1.046  | -1.029 | 2.963  | 9.885    | 0.007 | 56 | -0.614***  |
|            | Size    | 4.320  | 3.034  | -0.390 | 1.579  | 6.127    | 0.047 | 56 | -8.730***  |
|            | Stdret  | 0.006  | 0.002  | 1.399  | 5.785  | 36.374   | 0.000 | 56 | -4.535***  |
|            | Stdmkt  | 0.712  | 0.205  | 1.265  | 5.156  | 25.784   | 0.000 | 56 | -3.647***  |
|            | Lnage   | 1.993  | 0.594  | -0.752 | 2.549  | 5.756    | 0.054 | 56 | -9.547***  |
| 4D BCI     | Flows   | 3.466  | 31.088 | 1.359  | 7.219  | 58.765   | 0.000 | 56 | -1.029***  |
|            | Perf    | 2.160  | 3.317  | 0.151  | 3.304  | 7.709    | 0.021 | 56 | -0.546***  |
|            | Ecosize | 0.825  | 1.046  | -1.029 | 2.963  | 9.885    | 0.007 | 56 | -0.614***  |
|            | Size    | 1.412  | 1.869  | 0.619  | 1.530  | 8.617    | 0.013 | 56 | -11.522*** |
|            | Stdret  | 0.005  | 0.004  | 0.003  | 1.278  | 6.917    | 0.031 | 56 | -4.788***  |
|            | Stdmkt  | 0.712  | 0.205  | 1.265  | 5.156  | 25.784   | 0.000 | 56 | -3.647***  |
|            | Lnage   | 0.247  | 0.004  | -0.642 | 2.308  | 4.971    | 0.083 | 56 | -31.975*** |
| 3LAWS      | Flows   | 5.473  | 32.679 | 5.532  | 33.863 | 2508.153 | 0.000 | 56 | -0.705***  |
|            | Perf    | -0.073 | 3.199  | -0.468 | 2.154  | 6.459    | 0.039 | 56 | -1.009***  |
|            | Ecosize | 0.825  | 1.046  | -1.029 | 2.963  | 9.885    | 0.007 | 56 | -0.614***  |
|            | Size    | 1.120  | 0.202  | -0.262 | 1.939  | 3.265    | 0.080 | 56 | -7.511***  |
|            | Stdret  | 0.009  | 0.004  | 1.651  | 5.753  | 43.116   | 0.000 | 56 | -3.184***  |
|            | Stdmkt  | 0.712  | 0.205  | 1.265  | 5.156  | 25.784   | 0.000 | 56 | -3.647***  |
|            | Lnage   | 2.533  | 0.360  | -0.634 | 2.383  | 4.639    | 0.091 | 56 | -6.465***  |
| ABSA PRIME | Flows   | 14.411 | 46.788 | 2.516  | 13.353 | 309.166  | 0.000 | 56 | -0.586***  |
|            | Perf    | 3.410  | 4.089  | 0.104  | 2.728  | 8.683    | 0.013 | 56 | -0.567***  |
|            | Ecosize | 0.825  | 1.046  | -1.029 | 2.963  | 9.885    | 0.007 | 56 | -0.614***  |
|            | Size    | 3.065  | 3.057  | 0.142  | 1.238  | 7.431    | 0.024 | 56 | -7.638***  |
|            | Stdret  | 0.011  | 0.004  | 1.911  | 7.896  | 90.012   | 0.000 | 56 | -3.873***  |
|            | Stdmkt  | 0.712  | 0.205  | 1.265  | 5.156  | 25.784   | 0.000 | 56 | -3.647***  |
|            | Lnage   | 1.611  | 0.845  | -0.799 | 2.386  | 6.837    | 0.033 | 56 | -5.398***  |
| AFENA      | Flows   | 0.969  | 43.741 | 1.959  | 12.908 | 264.901  | 0.000 | 56 | -0.378***  |
|            | Perf    | 1.921  | 3.440  | -0.933 | 3.393  | 8.497    | 0.014 | 56 | -0.939***  |
|            | Ecosize | 0.825  | 1.046  | -1.029 | 2.963  | 9.885    | 0.007 | 56 | -0.614***  |
|            | Size    | 1.219  | 1.779  | 1.202  | 3.260  | 13.408   | 0.001 | 56 | -6.861***  |
|            | Stdret  | 0.002  | 0.005  | 1.105  | 2.482  | 11.799   | 0.002 | 56 | -7.701***  |
|            | Stdmkt  | 0.712  | 0.205  | 1.265  | 5.1569 | 25.784   | 0.000 | 56 | -3.647***  |
|            | Lnage   | 1.784  | 0.751  | -0.990 | 3.100  | 9.014    | 0.011 | 56 | -23.733*** |
| ALLAN GRAY | Flows   | -0.321 | 2.988  | 1.095  | 3.852  | 12.892   | 0.002 | 56 | -1.028***  |
|            | Perf    | 2.107  | 5.218  | -0.304 | 4.135  | 4.911    | 0.086 | 56 | -0.825***  |
|            | Ecosize | 0.825  | 1.046  | -1.029 | 2.963  | 9.885    | 0.007 | 56 | -0.614***  |
|            | Size    | 8.353  | 3.332  | -1.927 | 5.173  | 45.673   | 0.000 | 56 | -5.300***  |
|            | Stdret  | 0.008  | 0.004  | 1.384  | 5.828  | 36.526   | 0.000 | 56 | -5.056***  |

|             |         |         |         |        |        |          |       |    |            |
|-------------|---------|---------|---------|--------|--------|----------|-------|----|------------|
|             | Stdmkt  | 0.712   | 0.205   | 1.265  | 5.156  | 25.784   | 0.000 | 56 | -3.647***  |
|             | Lnage   | 0.183   | 0.002   | -0.589 | 2.224  | 4.638    | 0.000 | 56 | -33.974*** |
| ALUWANI     | Flows   | -0.204  | 25.299  | 2.750  | 16.749 | 511.707  | 0.000 | 56 | -1.122***  |
|             | Perf    | 3.549   | 5.780   | 0.108  | 2.240  | 6.736    | 0.034 | 56 | -0.741***  |
|             | Ecosize | 0.825   | 1.046   | -1.029 | 2.963  | 9.885    | 0.007 | 56 | -0.614***  |
|             | Size    | 1.945   | 0.051   | 1.649  | 6.886  | 60.623   | 0.000 | 56 | -8.274***  |
|             | Stdret  | 0.010   | 0.005   | 1.922  | 8.253  | 98.888   | 0.000 | 56 | -3.359***  |
|             | Stdmkt  | 0.712   | 0.205   | 1.265  | 5.156  | 25.784   | 0.000 | 56 | -3.647***  |
|             | Lnage   | 0.466   | 0.521   | 1.098  | 2.789  | 11.362   | 0.003 | 56 | -6.415***  |
| ANCHOR      | Flows   | 41.000  | 75.394  | 2.290  | 9.288  | 141.228  | 0.000 | 56 | -0.515***  |
|             | Perf    | 2.877   | 3.592   | -0.376 | 3.540  | 12.542   | 0.002 | 56 | -0.482***  |
|             | Ecosize | 0.825   | 1.046   | -1.029 | 2.963  | 9.885    | 0.007 | 56 | -0.614***  |
|             | Size    | 2.576   | 3.367   | 0.531  | 1.299  | 9.381    | 0.009 | 56 | -2.932**   |
|             | Stdret  | 0.004   | 0.004   | 0.268  | 1.298  | 7.430    | 0.024 | 56 | -5.534***  |
|             | Stdmkt  | 0.712   | 0.205   | 1.265  | 5.156  | 25.784   | 0.000 | 56 | -3.647***  |
|             | Lnage   | 0.757   | 0.831   | 0.379  | 1.429  | 7.092    | 0.029 | 56 | -23.836*** |
| BLUE ALPHA  | Flows   | 0.837   | 25.458  | 1.935  | 13.772 | 305.683  | 0.000 | 56 | -0.896***  |
|             | Perf    | 1.864   | 3.813   | -0.055 | 2.582  | 6.946    | 0.031 | 56 | -0.744***  |
|             | Ecosize | 0.825   | 1.046   | -1.029 | 2.963  | 9.885    | 0.007 | 56 | -0.614***  |
|             | Size    | 1.788   | 0.055   | -0.694 | 4.806  | 12.107   | 0.002 | 56 | -5.018***  |
|             | Stdret  | 0.028   | 0.033   | 1.642  | 5.347  | 38.013   | 0.000 | 56 | -4.726***  |
|             | Stdmkt  | 0.712   | 0.205   | 1.265  | 5.156  | 25.784   | 0.000 | 56 | -3.647***  |
|             | Lnage   | 1.074   | 0.224   | -1.102 | 3.327  | 11.577   | 0.003 | 56 | -9.547***  |
| CAPITA BCI  | Flows   | 20.225  | 93.622  | 5.921  | 40.103 | 3539     | 0.000 | 56 | -0.696***  |
|             | Perf    | 1.427   | 1.435   | -1.509 | 6.067  | 43.197   | 0.000 | 56 | -0.819***  |
|             | Ecosize | 0.825   | 1.046   | -1.029 | 2.963  | 9.885    | 0.007 | 56 | -0.614***  |
|             | Size    | 1.447   | 0.114   | 0.529  | 9.005  | 86.749   | 0.000 | 56 | 5.039***   |
|             | Stdret  | 0.004   | 0.000   | 0.018  | 4.782  | 7.415    | 0.025 | 56 | -7.672***  |
|             | Stdmkt  | 0.712   | 0.205   | 1.265  | 5.156  | 25.784   | 0.000 | 56 | -3.647***  |
|             | Lnage   | 0.591   | 0.607   | 0.846  | 2.196  | 8.186    | 0.017 | 56 | -5.898***  |
| CENTEAUR    | Flows   | 26.963  | 137.795 | 5.690  | 53.599 | 2781.937 | 0.000 | 56 | -0.561***  |
|             | Perf    | 2.779   | 6.282   | -0.890 | 4.182  | 10.658   | 0.005 | 56 | -0.412***  |
|             | Ecosize | 0.825   | 1.046   | -1.029 | 2.963  | 9.885    | 0.007 | 56 | -0.614***  |
|             | Size    | 1.949   | 0.178   | -0.302 | 1.394  | 6.871    | 0.032 | 56 | -8.953***  |
|             | Stdret  | 0.007   | 0.003   | 2.075  | 7.266  | 82.662   | 0.000 | 56 | -3.699***  |
|             | Stdmkt  | 0.712   | 0.205   | 1.265  | 5.156  | 25.784   | 0.000 | 56 | -3.647***  |
|             | Lnage   | 0.464   | 0.017   | -0.681 | 2.374  | 5.242    | 0.073 | 56 | -3.988***  |
| CLUCASGRAY  | Flows   | 1.597   | 1.703   | -1.387 | 6.219  | 42.151   | 0.000 | 56 | -0.940***  |
|             | Perf    | 0.789   | 2.836   | 0.394  | 4.558  | 7.111    | 0.029 | 56 | -0.786***  |
|             | Ecosize | 0.825   | 1.046   | -1.029 | 2.963  | 9.885    | 0.007 | 56 | -0.614***  |
|             | Size    | 1.934   | 2.668   | 0.707  | 1.636  | 9.005    | 0.011 | 56 | -8.457***  |
|             | Stdret  | 0.008   | 0.002   | 0.950  | 4.403  | 13.021   | 0.001 | 56 | -4.061***  |
|             | Stdmkt  | 0.712   | 0.205   | 1.265  | 5.156  | 25.784   | 0.000 | 56 | -3.647***  |
|             | Lnage   | 1.824   | 0.696   | -0.772 | 2.477  | 6.204    | 0.045 | 56 | -3.745***  |
| HARVARD BCI | Flows   | 125.159 | 608.591 | 5.423  | 33.039 | 2379.950 | 0.000 | 56 | -0.430***  |
|             | Perf    | 0.006   | 2.605   | -1.347 | 7.701  | 68.516   | 0.000 | 56 | -0.498***  |
|             | Ecosize | 0.825   | 1.046   | -1.029 | 2.963  | 9.885    | 0.007 | 56 | -0.614***  |
|             | Size    | 1.051   | 0.049   | -0.684 | 3.833  | 5.994    | 0.049 | 56 | -6.565***  |
|             | Stdret  | 0.008   | 0.002   | 0.667  | 3.937  | 6.205    | 0.044 | 56 | -4.813***  |
|             | Stdmkt  | 0.712   | 0.205   | 1.265  | 5.156  | 25.784   | 0.000 | 56 | -3.647***  |
|             | Lnage   | 0.940   | 0.312   | -0.833 | 2.341  | 7.499    | 0.024 | 56 | -5.399***  |
| IMARA       | Flows   | 10.679  | 89.253  | 5.509  | 36.498 | 2901.458 | 0.000 | 56 | -0.859***  |
|             | Perf    | 2.288   | 3.716   | -0.381 | 3.564  | 7.914    | 0.019 | 56 | -0.574***  |
|             | Ecosize | 0.825   | 1.046   | -1.029 | 2.963  | 9.885    | 0.007 | 56 | -0.614***  |
|             | Size    | 1.032   | 0.075   | -0.718 | 2.738  | 4.976    | 0.083 | 56 | -7.620***  |
|             | Stdret  | 0.008   | 0.002   | 0.327  | 2.939  | 1.012    | 0.060 | 56 | -4.455***  |
|             | Stdmkt  | 0.712   | 0.205   | 1.265  | 5.156  | 25.784   | 0.000 | 56 | -3.647***  |
|             | Lnage   | 1.824   | 0.696   | -0.772 | 2.477  | 6.204    | 0.000 | 56 | -3.745***  |

|                |         |        |         |        |        |          |       |    |            |
|----------------|---------|--------|---------|--------|--------|----------|-------|----|------------|
| IP HIGH        | Flows   | 21.979 | 76.404  | 3.566  | 17.259 | 593.134  | 0.000 | 56 | -0.666***  |
|                | Perf    | -0.927 | 2.905   | 0.562  | 4.427  | 7.695    | 0.021 | 56 | -1.009***  |
|                | Ecosize | 0.825  | 1.046   | -1.029 | 2.963  | 9.885    | 0.007 | 56 | -0.614***  |
|                | Size    | 1.818  | 0.065   | 1.552  | 7.749  | 75.093   | 0.000 | 56 | -4.719***  |
|                | Stdret  | 0.009  | 0.002   | 1.932  | 8.109  | 95.739   | 0.000 | 56 | -4.246***  |
|                | Stdmkt  | 0.712  | 0.205   | 1.265  | 5.156  | 25.784   | 0.000 | 56 | -3.647***  |
|                | Lnage   | 0.723  | 0.683   | 0.599  | 1.796  | 6.739    | 0.034 | 56 | -5.813***  |
| KAGISO         | Flows   | 15.845 | 49.634  | 1.843  | 7.018  | 69.366   | 0.000 | 56 | -0.666***  |
|                | Perf    | 3.382  | 6.054   | 0.895  | 4.998  | 16.788   | 0.000 | 56 | -1.005***  |
|                | Ecosize | 0.825  | 1.046   | -1.029 | 2.963  | 9.885    | 0.007 | 56 | -0.614***  |
|                | Size    | 1.752  | 0.320   | -1.009 | 2.575  | 9.942    | 0.006 | 56 | -6.209***  |
|                | Stdret  | 0.007  | 0.002   | 0.591  | 4.306  | 7.231    | 0.027 | 56 | -4.284***  |
|                | Stdmkt  | 0.712  | 0.205   | 1.265  | 5.156  | 25.784   | 0.000 | 56 | -3.647***  |
|                | Lnage   | 1.993  | 0.594   | -0.752 | 2.549  | 5.755    | 0.056 | 56 | -9.547***  |
| MAESTRO        | Flows   | 46.976 | 259.842 | 6.605  | 47.126 | 4950.395 | 0.000 | 56 | -0.629***  |
|                | Perf    | 0.484  | 3.479   | -0.587 | 3.919  | 5.188    | 0.075 | 56 | -0.452**   |
|                | Ecosize | 0.825  | 1.046   | -1.029 | 2.963  | 9.885    | 0.007 | 56 | -0.614***  |
|                | Size    | 2.029  | 2.356   | 0.549  | 1.838  | 5.961    | 0.051 | 56 | -7.281***  |
|                | Stdret  | 0.008  | 0.004   | 1.779  | 8.764  | 107.068  | 0.000 | 56 | -4.038***  |
|                | Stdmkt  | 0.712  | 0.205   | 1.265  | 5.156  | 25.784   | 0.000 | 56 | -3.647***  |
|                | Lnage   | 0.590  | 0.027   | -0.658 | 2.337  | 5.068    | 0.079 | 56 | 31.483***  |
| NAVIGA         | Flows   | 1.278  | 21.181  | -0.063 | 7.762  | 52.971   | 0.000 | 56 | -0.879***  |
|                | Perf    | -0.092 | 2.259   | -0.007 | 4.959  | 8.959    | 0.011 | 56 | -1.415***  |
|                | Ecosize | 0.825  | 1.046   | -1.029 | 2.963  | 9.885    | 0.007 | 56 | -0.614***  |
|                | Size    | 2.405  | 3.070   | 0.547  | 1.444  | 8.446    | 0.015 | 56 | -7.343***  |
|                | Stdret  | 0.004  | 0.003   | 0.197  | 1.925  | 3.057    | 0.052 | 56 | -3.505***  |
|                | Stdmkt  | 0.712  | 0.205   | 1.265  | 5.156  | 25.784   | 0.000 | 56 | -3.647***  |
|                | Lnage   | 1.561  | 0.916   | -0.789 | 2.172  | 7.407    | 0.025 | 56 | -3.041***  |
| NORTHSTAR      | Flows   | 8.305  | 26.746  | 1.539  | 6.589  | 52.176   | 0.000 | 56 | -0.774***  |
|                | Perf    | 2.462  | 3.733   | 0.808  | 6.745  | 38.825   | 0.000 | 56 | -0.713***  |
|                | Ecosize | 0.825  | 1.046   | -1.029 | 2.963  | 9.885    | 0.007 | 56 | -0.614***  |
|                | Size    | 4.438  | 1.049   | 0.137  | 1.357  | 6.472    | 0.039 | 56 | -3.005**   |
|                | Stdret  | 0.001  | 0.001   | 0.897  | 2.191  | 9.042    | 0.011 | 56 | -13.224*** |
|                | Stdmkt  | 0.712  | 0.205   | 1.265  | 5.156  | 25.784   | 0.000 | 56 | -3.647***  |
|                | Lnage   | 2.772  | 0.258   | -0.306 | 1.914  | 3.627    | 0.023 | 56 | -22.451*** |
| PERSONAL TRUST | Flows   | 28.359 | 207.011 | 7.261  | 53.822 | 6518.791 | 0.000 | 56 | -1.162***  |
|                | Perf    | -0.286 | 3.139   | -0.381 | 5.003  | 10.715   | 0.005 | 56 | -0.897***  |
|                | Ecosize | 0.825  | 1.046   | -1.029 | 2.963  | 9.8850   | 0.007 | 56 | -0.614***  |
|                | Size    | 1.789  | 0.166   | -0.115 | 1.660  | 4.311    | 0.081 | 56 | -8.039***  |
|                | Stdret  | 0.008  | 0.002   | 1.060  | 3.929  | 12.506   | 0.002 | 56 | -3.956***  |
|                | Stdmkt  | 0.712  | 0.205   | 1.265  | 5.156  | 25.784   | 0.000 | 56 | -3.647***  |
|                | Lnage   | 1.173  | 0.783   | -0.034 | 1.415  | 5.873    | 0.054 | 56 | -21.134*** |
| PRESCIENT      | Flows   | 41.810 | 169.122 | 3.640  | 17.513 | 615.158  | 0.000 | 56 | -0.882***  |
|                | Perf    | 3.792  | 4.582   | -0.929 | 2.401  | 8.887    | 0.012 | 56 | -0.805***  |
|                | Ecosize | 0.825  | 1.046   | -1.029 | 2.963  | 9.885    | 0.007 | 56 | -0.614***  |
|                | Size    | 1.815  | 0.155   | -1.136 | 6.663  | 43.339   | 0.000 | 56 | -2.876***  |
|                | Stdret  | 0.008  | 0.002   | 0.407  | 2.723  | 1.724    | 0.014 | 56 | -4.320***  |
|                | Stdmkt  | 0.712  | 0.205   | 1.265  | 5.156  | 25.784   | 0.000 | 56 | -3.647***  |
|                | Lnage   | 0.135  | 0.001   | -0.595 | 2.235  | 4.681    | 0.096 | 56 | -13.133**  |
| RCI            | Flows   | 2.953  | 33.788  | 3.738  | 24.994 | 1259.079 | 0.000 | 56 | -1.051***  |
|                | Perf    | 1.539  | 4.598   | -1.031 | 4.144  | 12.972   | 0.002 | 56 | -0.636***  |
|                | Ecosize | 0.825  | 1.046   | -1.029 | 2.963  | 9.885    | 0.007 | 56 | -0.614***  |
|                | Size    | 0.538  | 0.005   | -0.557 | 4.172  | 6.105    | 0.047 | 56 | -3.492***  |
|                | Stdret  | 0.007  | 0.004   | -3.037 | 20.201 | 776.432  | 0.000 | 56 | -8.109***  |
|                | Stdmkt  | 0.712  | 0.205   | 1.265  | 5.156  | 25.784   | 0.000 | 56 | -3.647***  |
|                | Lnage   | 1.131  | 0.172   | -0.867 | 2.753  | 7.165    | 0.027 | 56 | -3.810***  |
| RECM           | Flows   | 3.395  | 28.565  | 1.649  | 10.479 | 155.945  | 0.000 | 56 | -0.600***  |
|                | Perf    | 1.238  | 4.907   | -0.922 | 5.689  | 24.809   | 0.000 | 56 | -0.428***  |

|         |         |        |        |        |       |        |       |    |            |
|---------|---------|--------|--------|--------|-------|--------|-------|----|------------|
|         | Ecosize | 0.825  | 1.046  | -1.029 | 2.963 | 9.885  | 0.007 | 56 | -0.614***  |
|         | Size    | 1.846  | 0.149  | -0.479 | 1.913 | 4.902  | 0.086 | 56 | -5.804***  |
|         | Stdret  | 0.006  | 0.002  | 1.872  | 6.715 | 64.894 | 0.000 | 56 | -7.738***  |
|         | Stdmkt  | 0.712  | 0.205  | 1.265  | 5.156 | 25.784 | 0.000 | 56 | -3.647***  |
|         | Lnage   | 1.131  | 0.172  | -0.867 | 2.753 | 7.165  | 0.000 | 56 | -3.811**   |
| STANLIB | Flows   | 27.838 | 51.257 | 1.653  | 7.679 | 76.599 | 0.000 | 56 | -0.501***  |
|         | Perf    | 4.012  | 4.374  | -0.093 | 2.529 | 11.095 | 0.004 | 56 | -0.733***  |
|         | Ecosize | 0.825  | 1.046  | -1.029 | 2.963 | 9.885  | 0.007 | 56 | -0.614***  |
|         | Size    | 1.864  | 0.214  | -0.753 | 1.984 | 7.694  | 0.021 | 56 | -10.021*** |
|         | Stdret  | 0.010  | 0.004  | 1.891  | 7.789 | 86.879 | 0.000 | 56 | -3.873***  |
|         | Stdmkt  | 0.712  | 0.205  | 1.265  | 5.156 | 25.784 | 0.000 | 56 | -3.647***  |
|         | Lnage   | 0.888  | 0.418  | -1.239 | 3.219 | 14.441 | 0.000 | 56 | -8.279***  |

Source: Authors' estimations (2021).
